# Supplementary material for: Probabilistic Tsunami Hazard Assessment in The Lesser Sunda Islands, Indonesia
Source: Research Square preprint supplement (doi:10.21203/rs.3.rs-7771651/v1), 2025-10-16
Supplement: Supplementary file 1 [file 5ad8ca12ce9b3729a8ceea25.docx]

**Supplementary material**

Probabilistic Tsunami Hazard Assessment in The Lesser Sunda Islands

Shofia Karima1,2*, Hamzah Latief3, Iyan E. Mulia4, Gandhi Napitupulu5,3

1*Master’s Degree in Earth Sciences, Faculty of Earth Science and Engineering, Bandung Institute of Technology, Jalan Ganesha No. 10, Bandung, 100190, Indonesia.

2Research Center for Geological Disaster, National Research and Innovation Agency, Bandung 40293, Indonesia

3Environmental and Applied Oceanography Research Group, Faculty of Earth Science and Technology, Bandung Institute of Technology, Bandung 40132, Indonesia

4Faculty of Earth Science and Technology, Bandung Institute of Technology, Bandung 40132, Indonesia

5Coastal Hazards and Energy System Science Laboratory, Graduate School of Innovation and Practice for Smart Society, Hiroshima University, Hiroshima, 739-8529, Japan

[shof002@brin.go.id](mailto:shof002@brin.go.id)


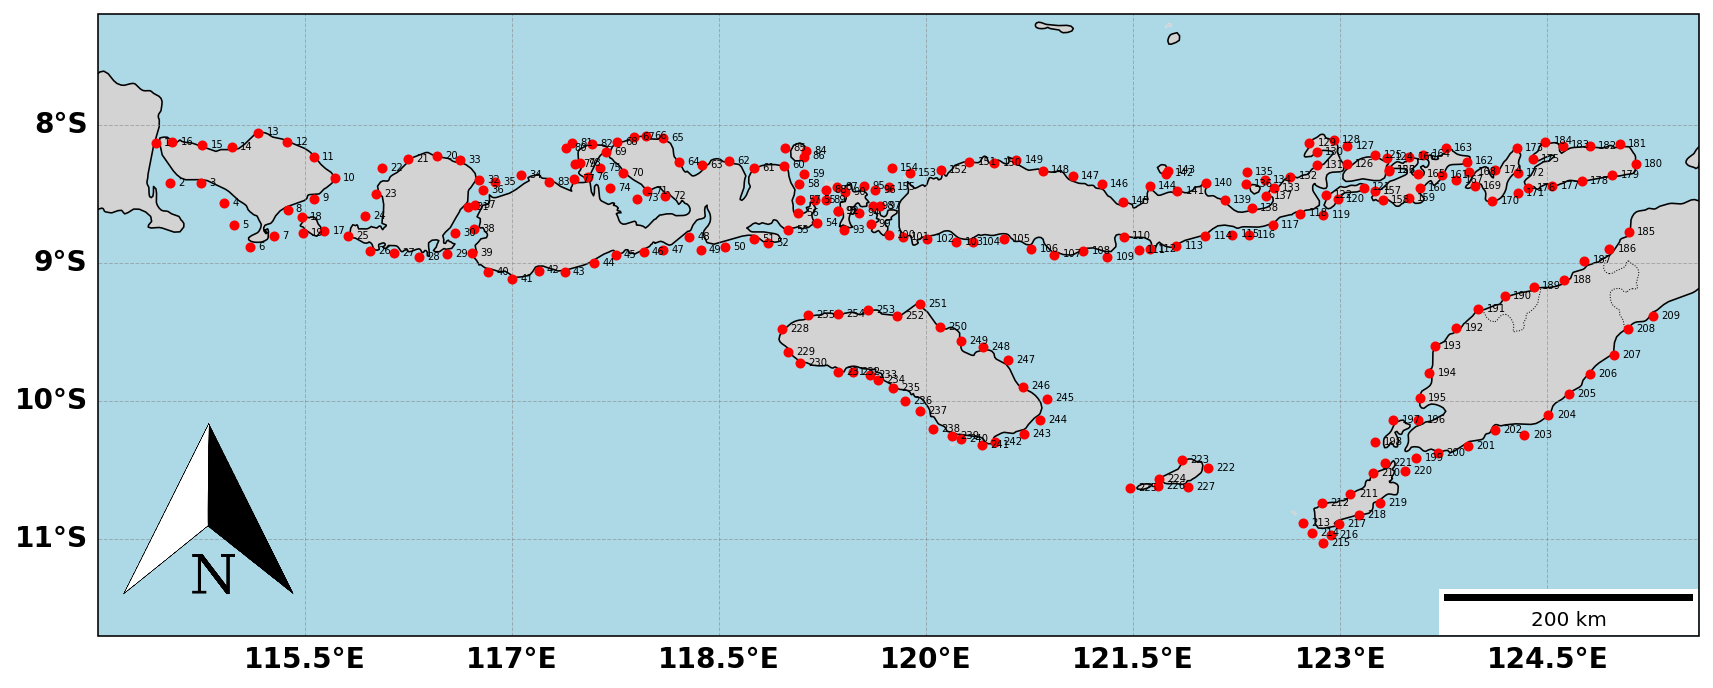


(a)


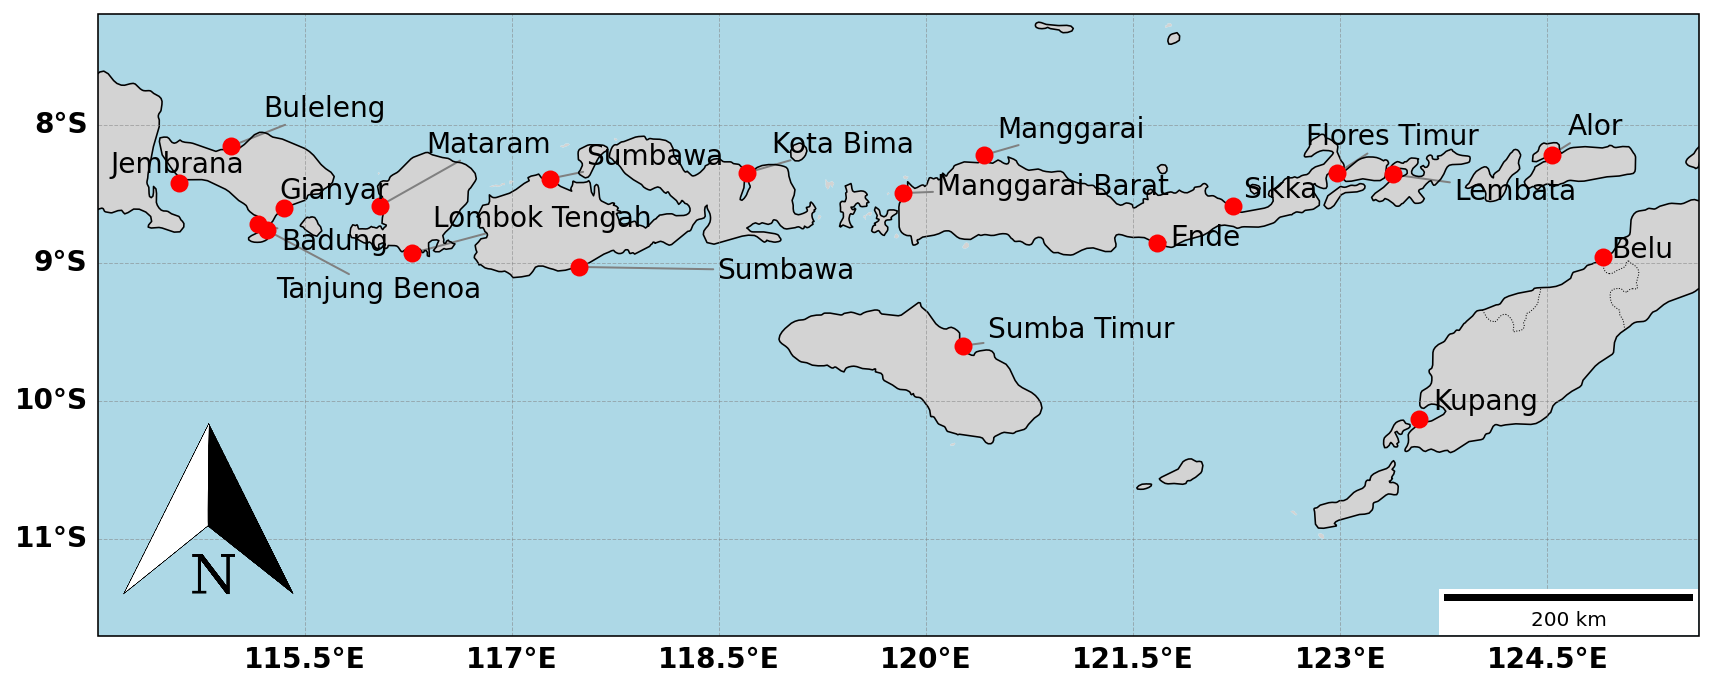


(b)

Supplementary Fig. 1 The location of (a) 255 points of interest and (b) 20 strategic locations.

| 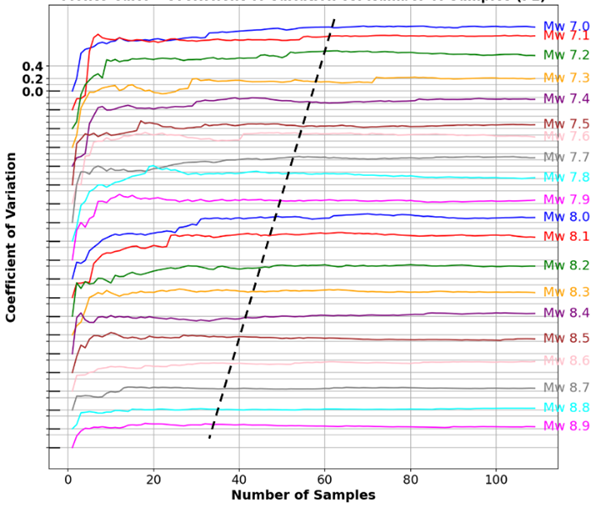 |
| --- |
| Supplementary Fig. 2 Monte Carlo analysis for East Java Subduction |
| 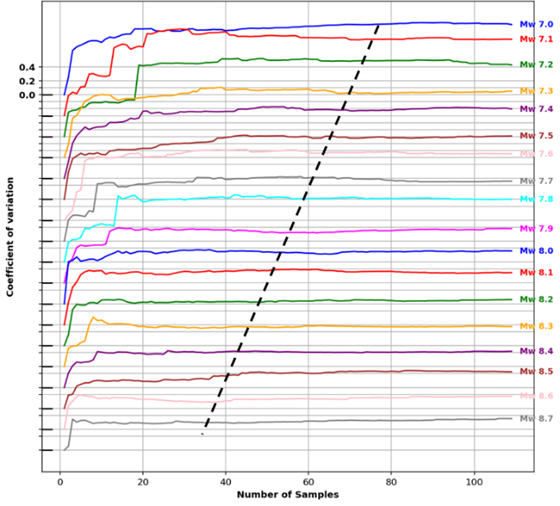 |
| Supplementary Fig. 3 Monte Carlo analysis for Bali Subduction |
| 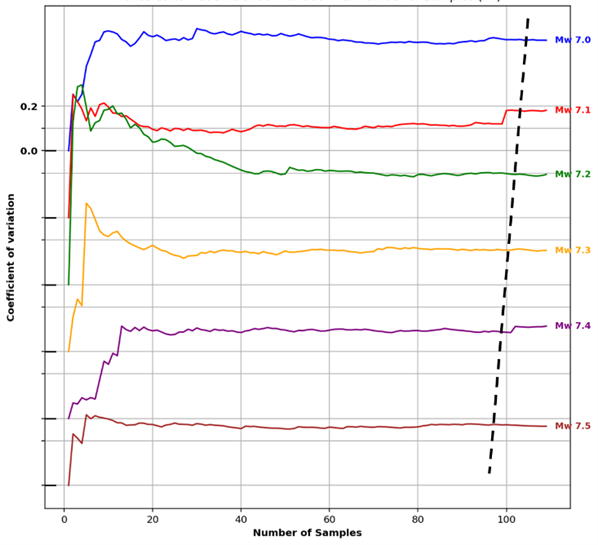 |
| Supplementary Fig. 4 Monte Carlo analysis for Timor FTB 1 |
| 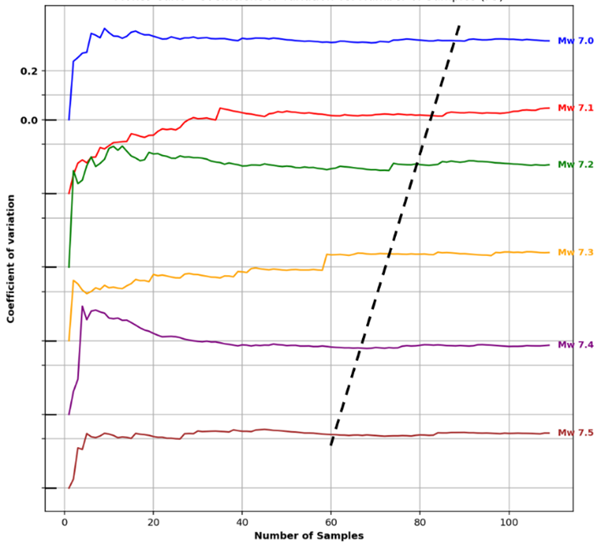 |
| Supplementary Fig. 5 Monte Carlo analysis for Timor FTB 2 |
| 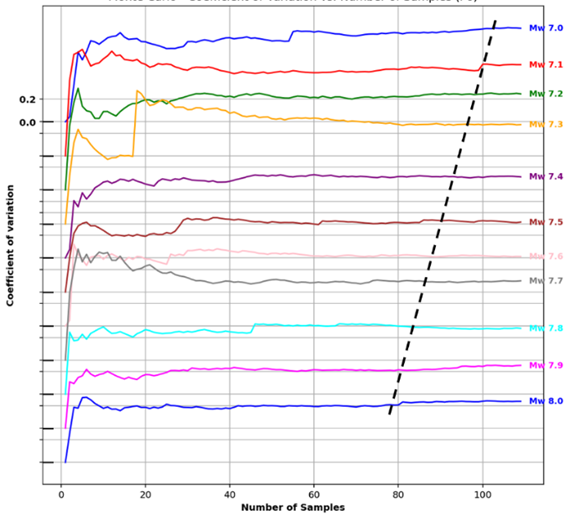 |
| Supplementary Fig. 6 Monte Carlo analysis for Timor FTB 3 |
| 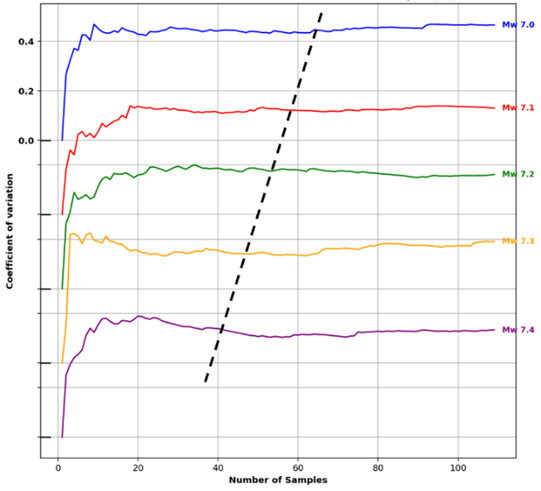 |
| Supplementary Fig.7 Monte Carlo analysis for Bali *Thrust* |
| 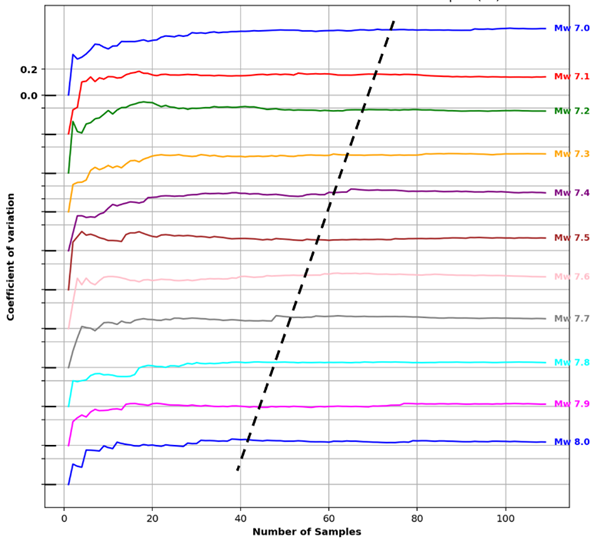 |
| Supplementary Fig. 8 Monte Carlo analysis for Sumbawa *Thrust.* |
| 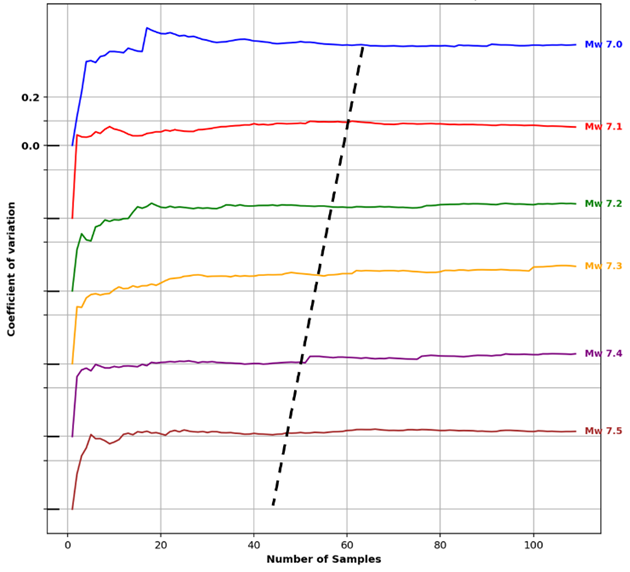 |
| Supplementary Fig. 9 Monte Carlo analysis for *Flores Thrust 1.* |
| 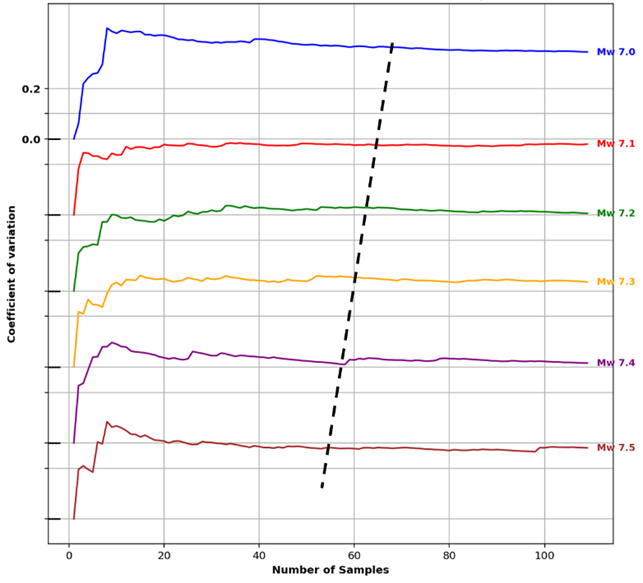 |
| Supplementary Fig. 10 Monte Carlo analysis for *Flores Thrust 2* |

| 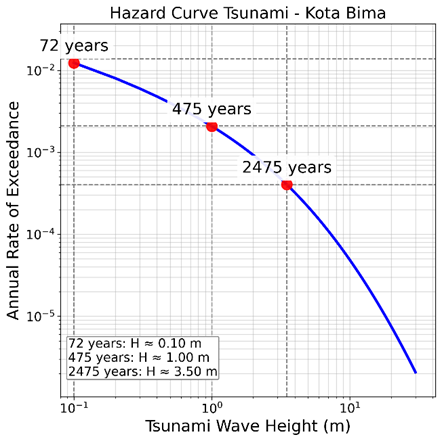 | 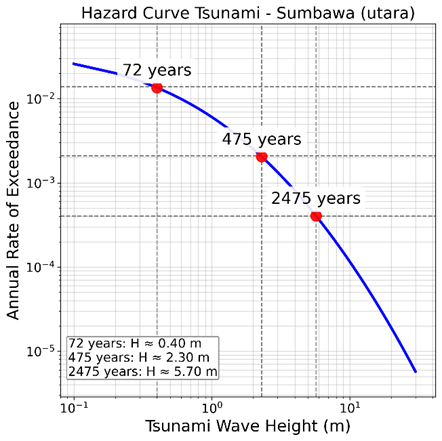 |
| --- | --- |
| 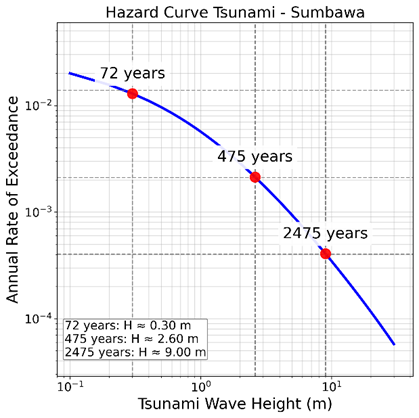 | 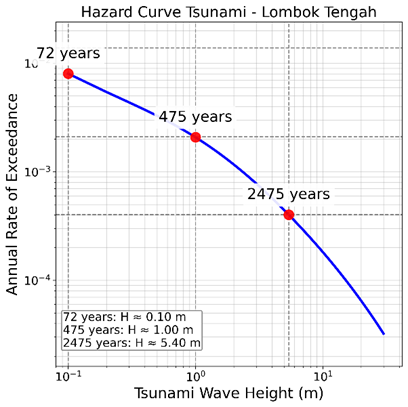 |
| 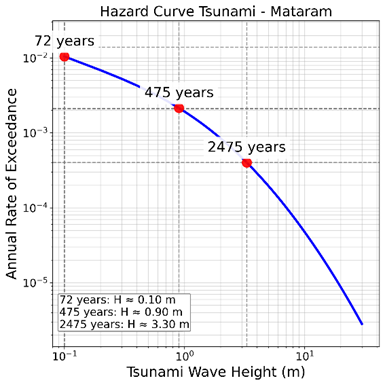 | |

Supplementary Fig. 11 Hazard curves for strategic location in NTB

| 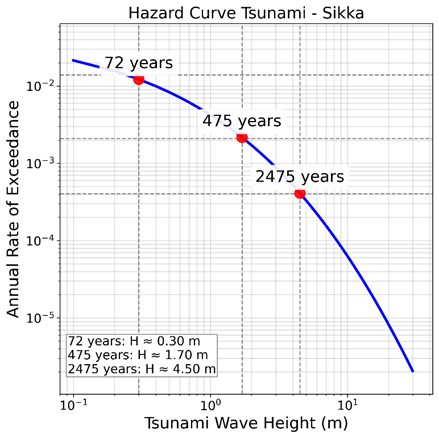 | 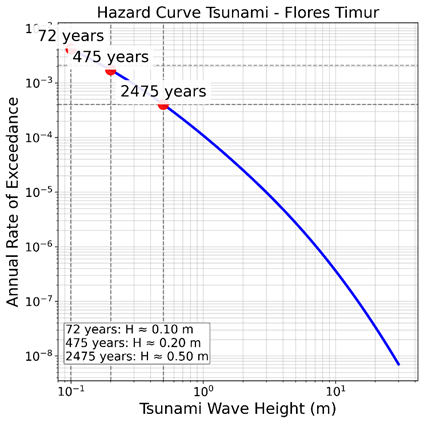 |
| --- | --- |
| 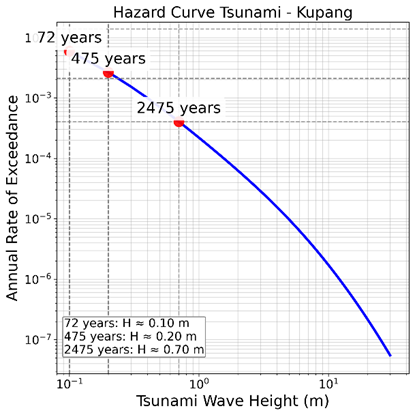 | 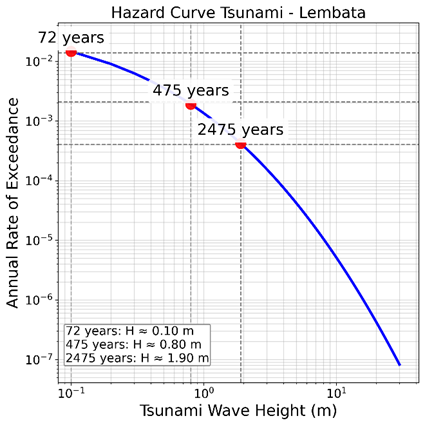 |
| 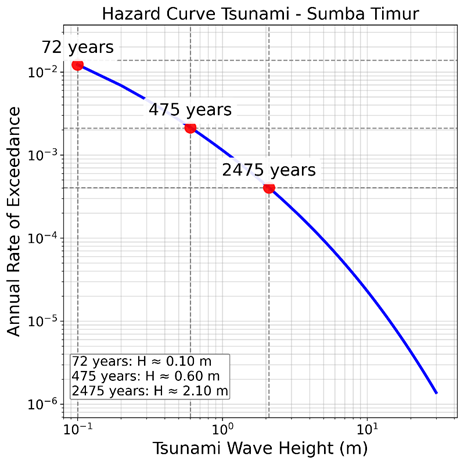 | 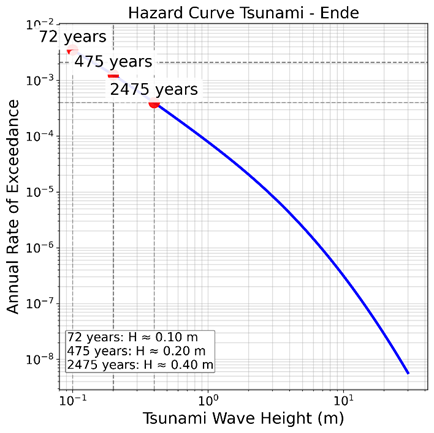 |
| 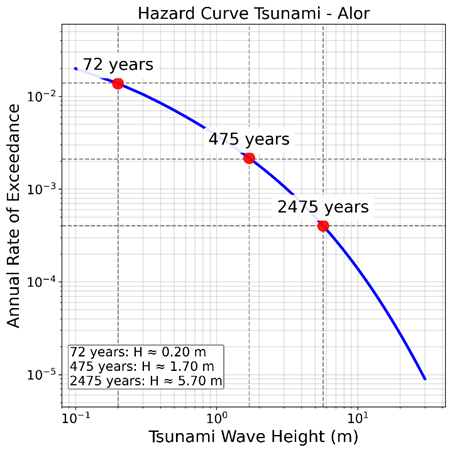 | 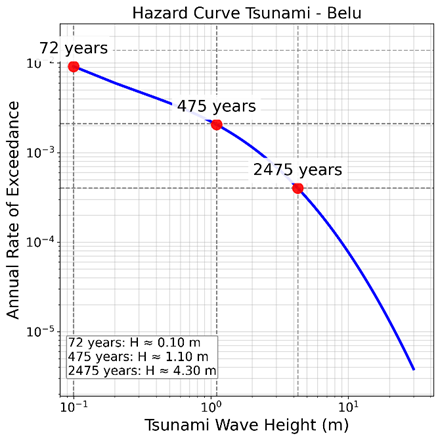 |
| 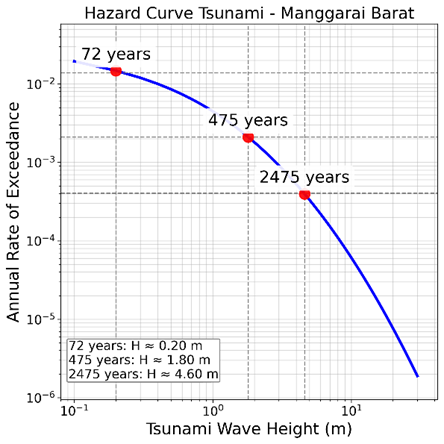 | 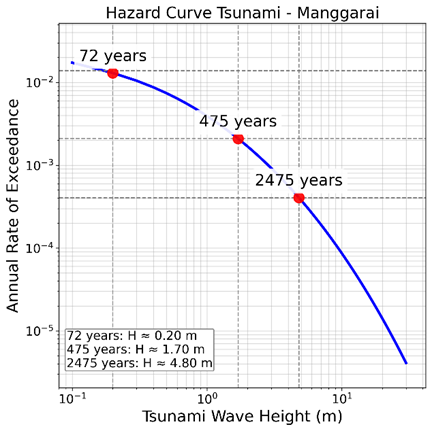 |

Supplementary Fig. 12 Hazard curves for strategic location in NTT

| 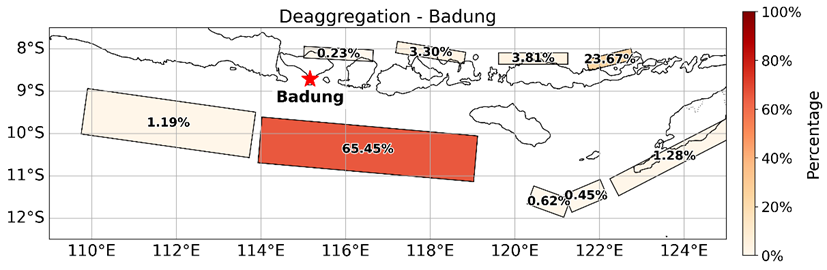 |
| --- |
| 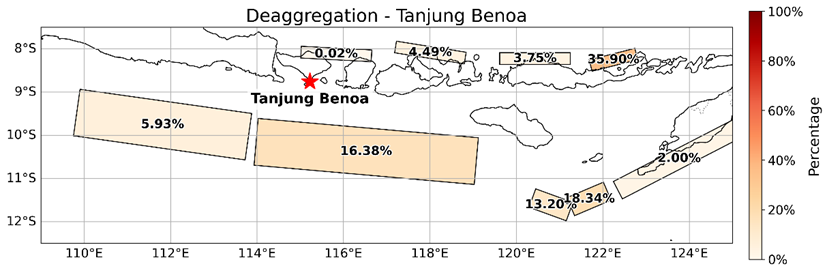 |
| 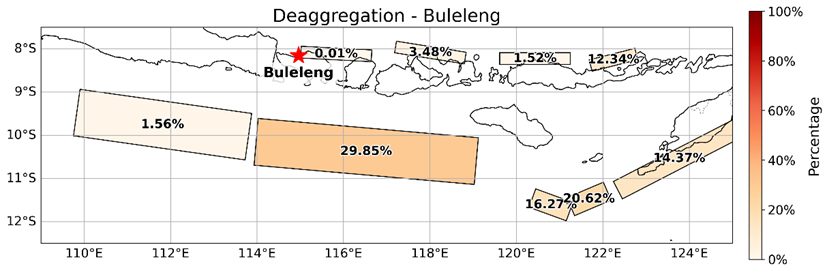 |
| 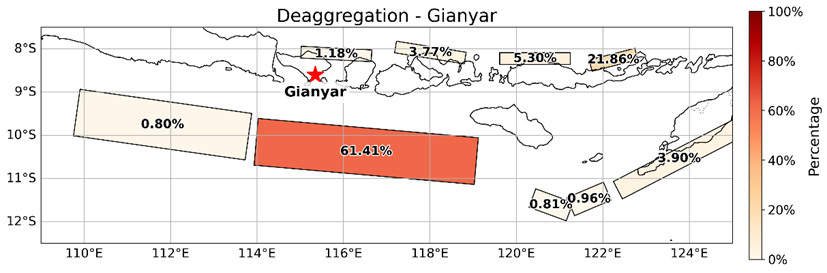 |
| 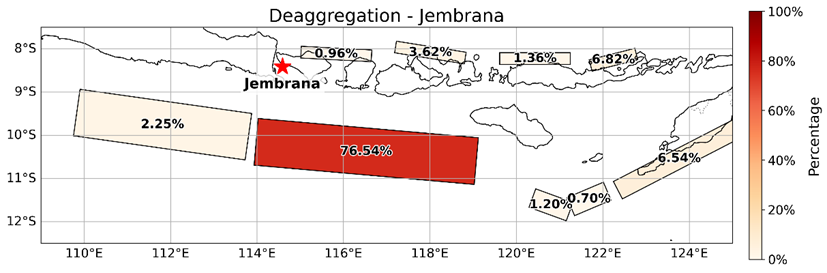 |

Supplementary Fig. 13 Deaggregation for 5 locations in Bali (RP 475 years)

| 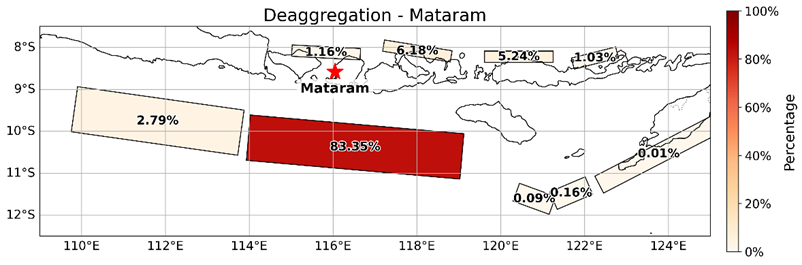 |
| --- |
| 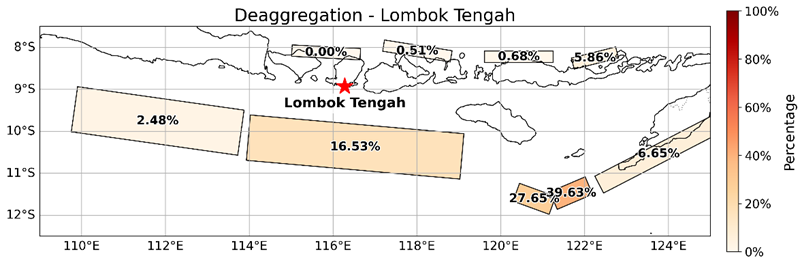 |
| 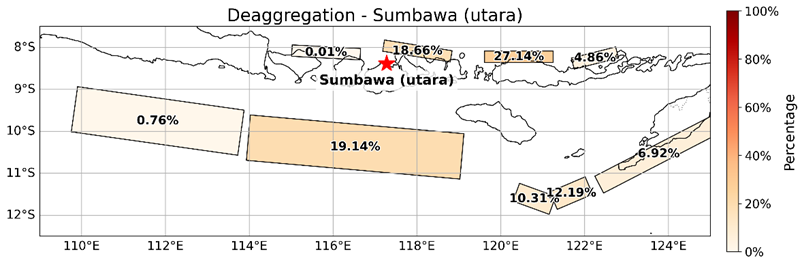 |
| 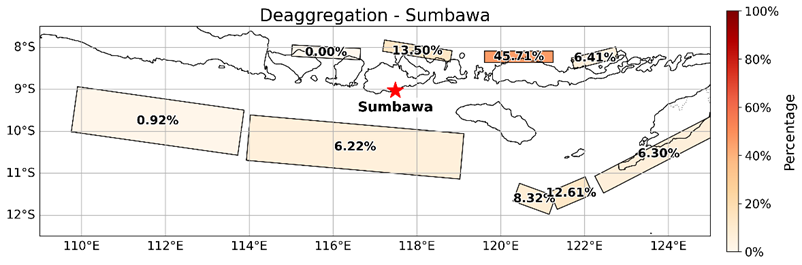 |
| 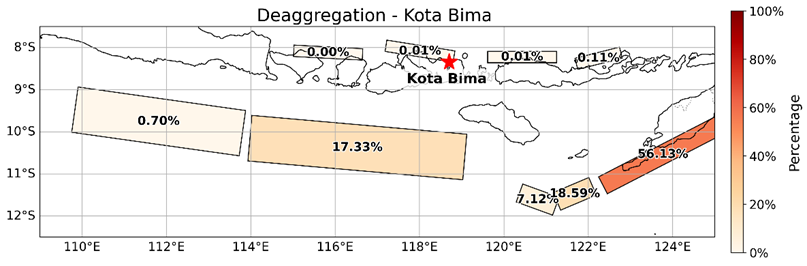 |

Supplementary Fig. 13 Deaggregation for 5 locations in NTB (RP 475 years)

| 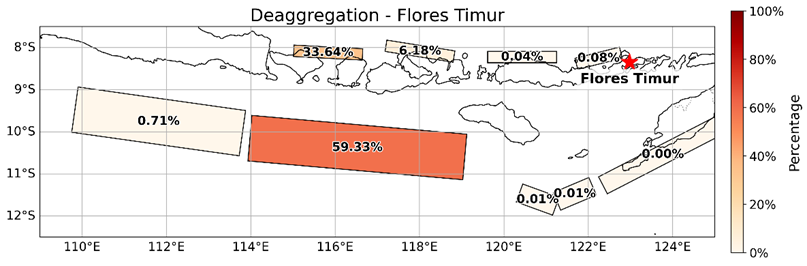 |
| --- |
| 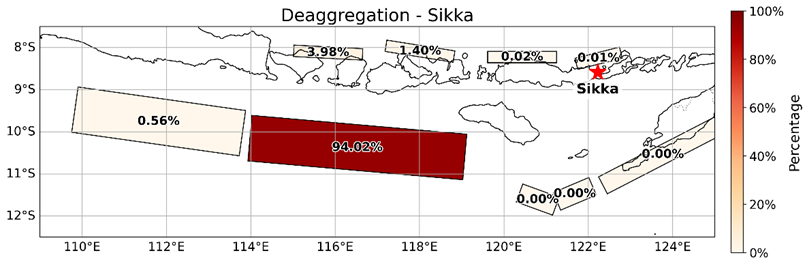 |
| 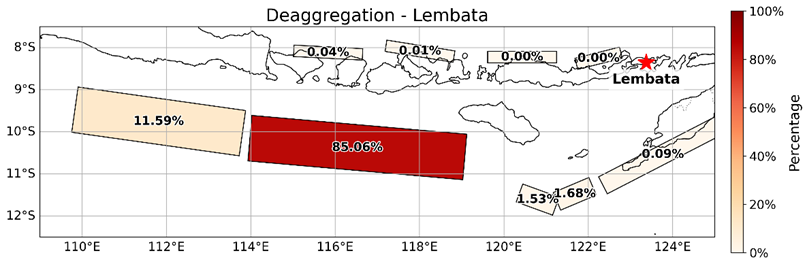 |
| 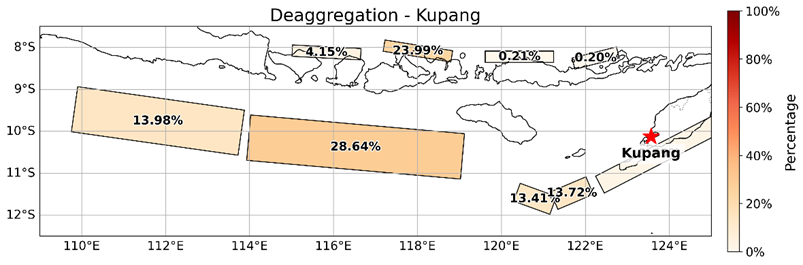 |
| 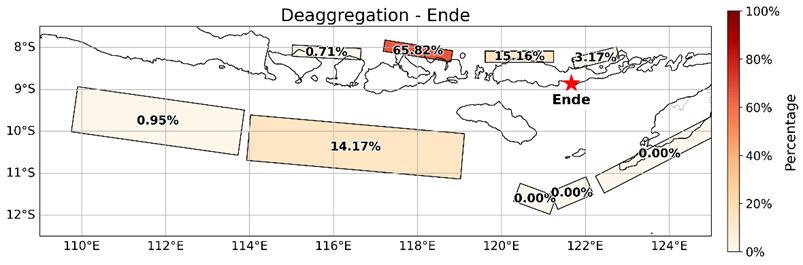 |
| 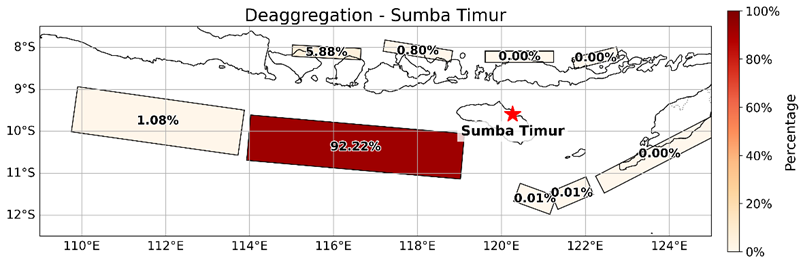 |
| 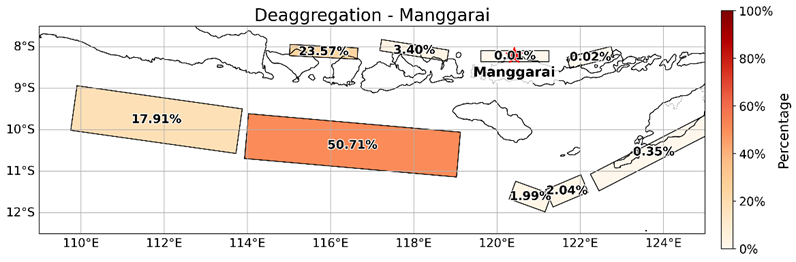 |
| 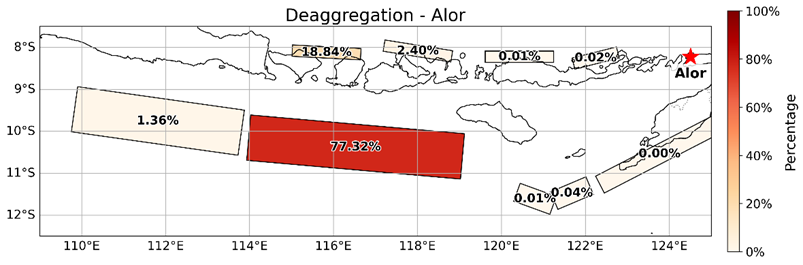 |
| 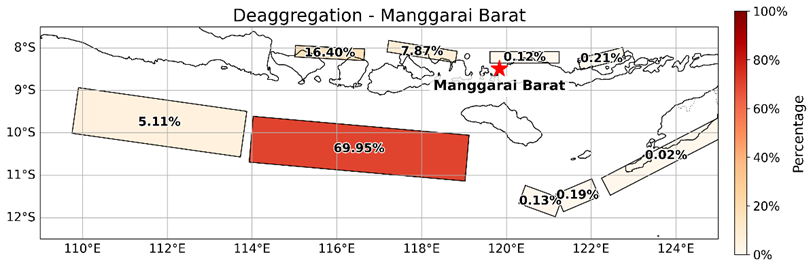 |
| 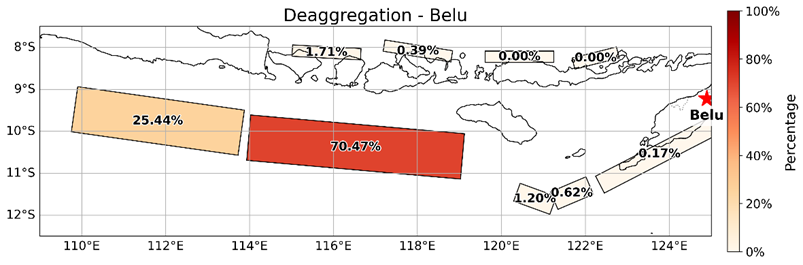 |

Supplementary Fig. 13 Deaggregation for 10 locations in NTT (RP 475 years)

| 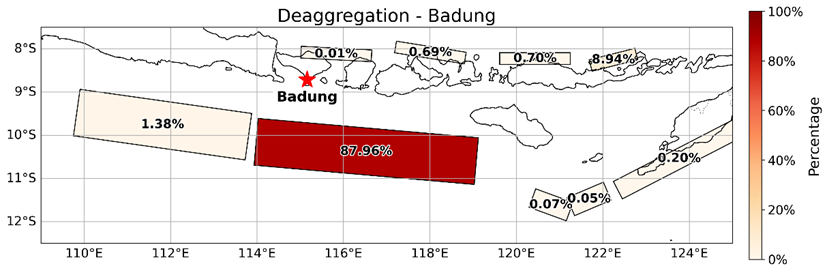 |
| --- |
| 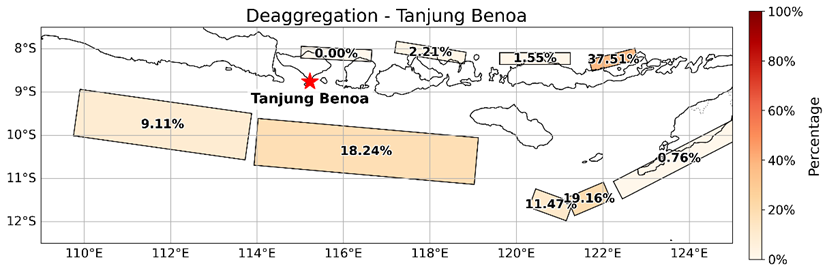 |
| 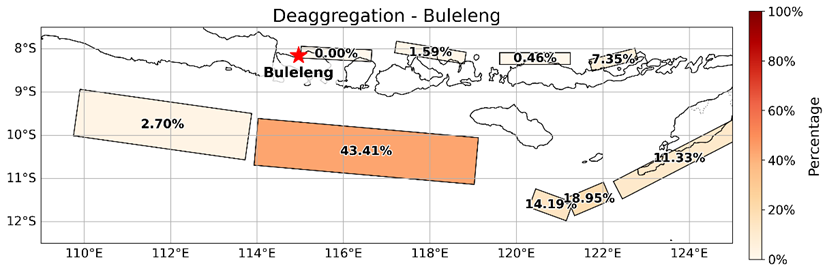 |
| 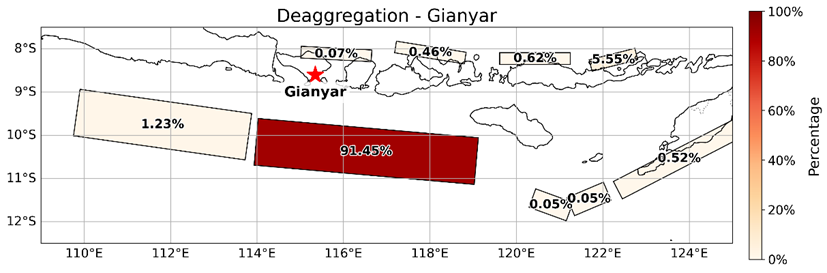 |
| 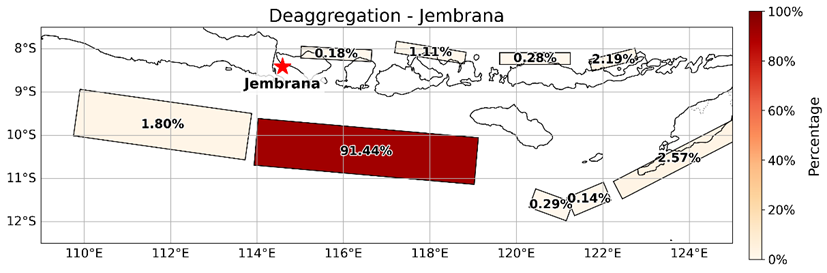 |

Supplementary Fig. 14 Deaggregation for 5 locations in Bali (RP 2475 years)

| 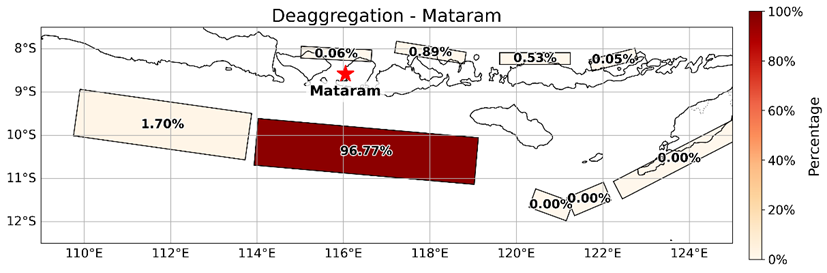 |
| --- |
| 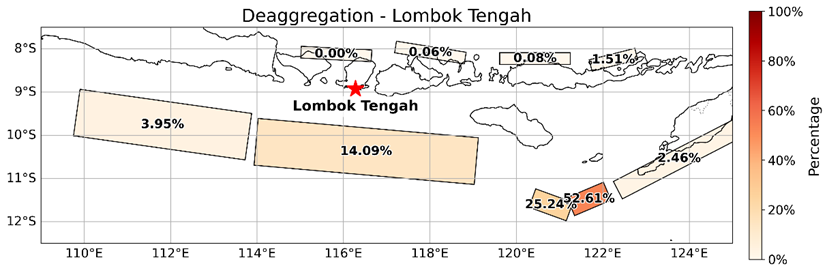 |
| 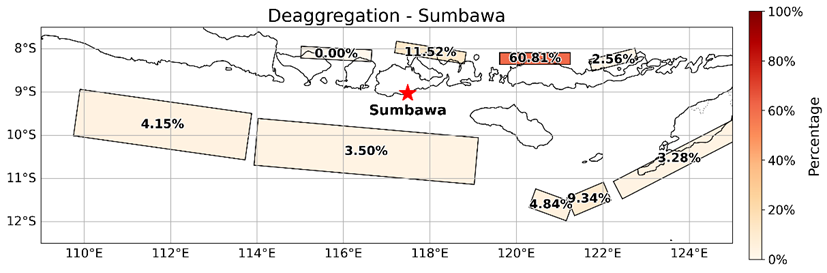 |
| 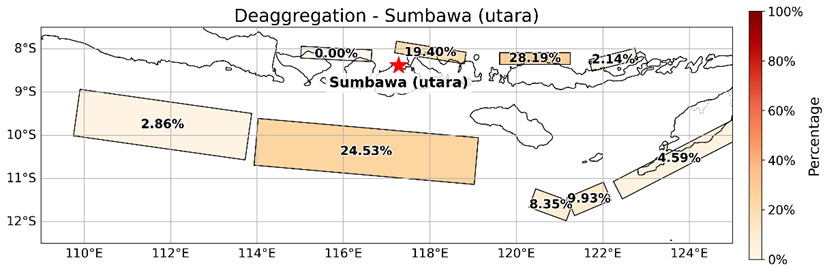 |
| 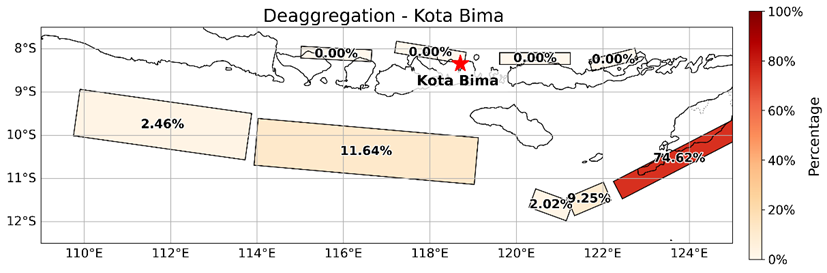 |

Supplementary Fig. 15 Deaggregation for 5 locations in NTB (RP 2475 years)

| 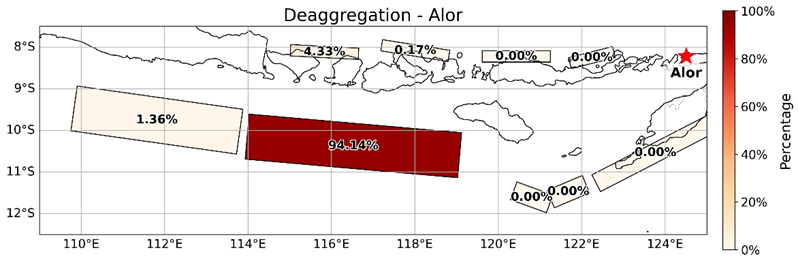 |
| --- |
| 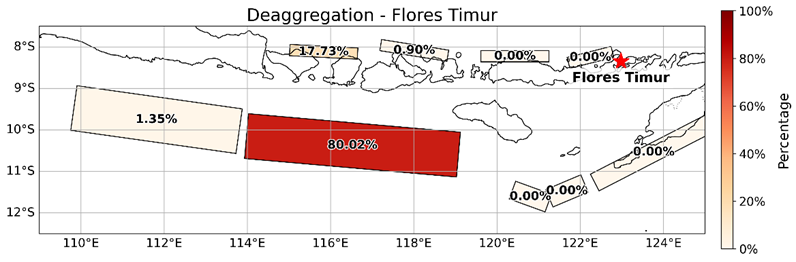 |
| 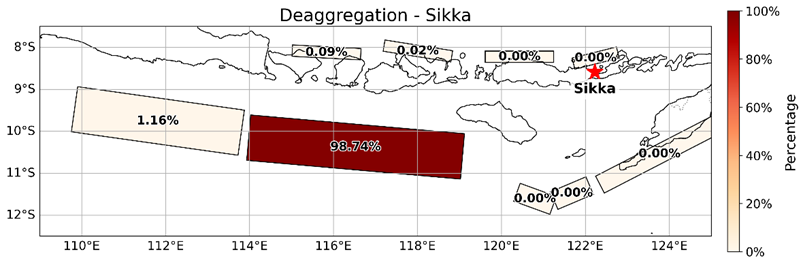 |
| 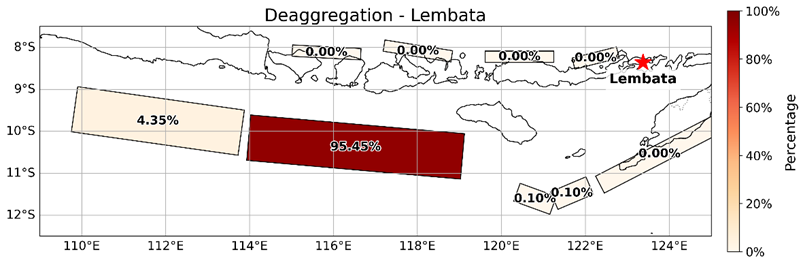 |
| 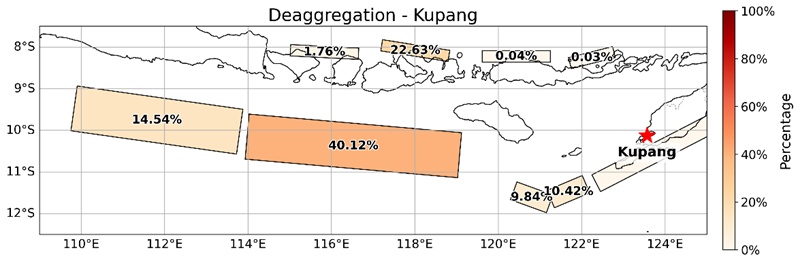 |
| 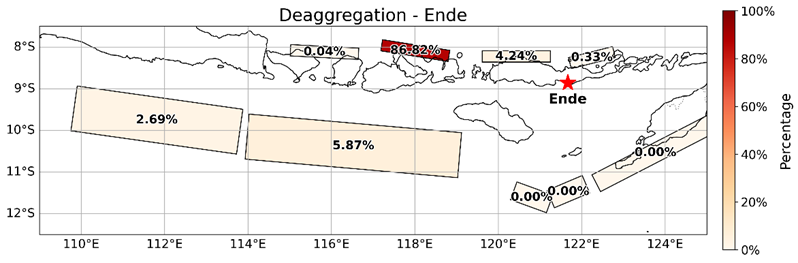 |
| 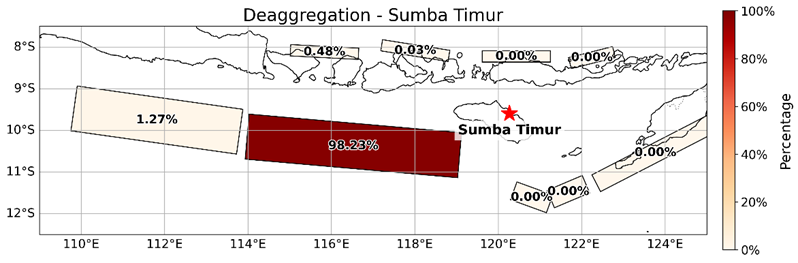 |
| 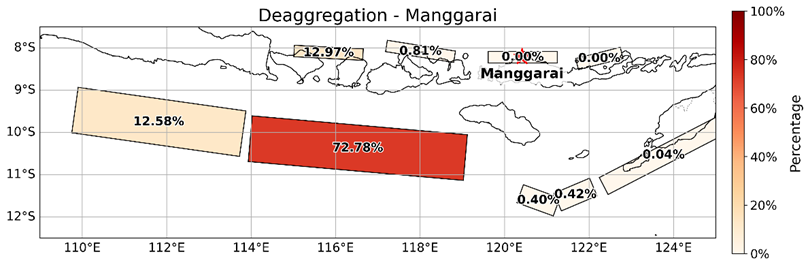 |
| 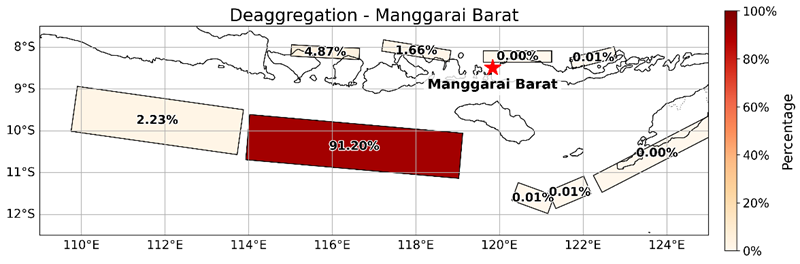 |
| 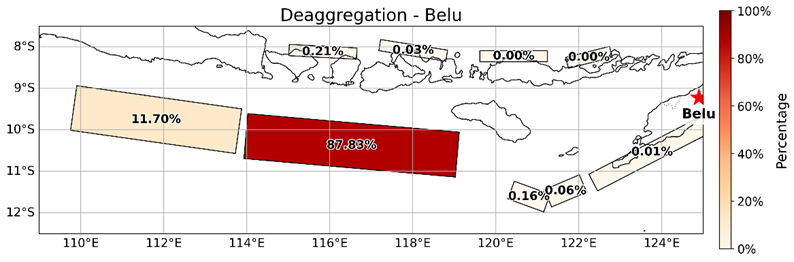 |

Supplementary Fig. 15 Deaggregation for 10 locations in NTT (RP 2475 years)


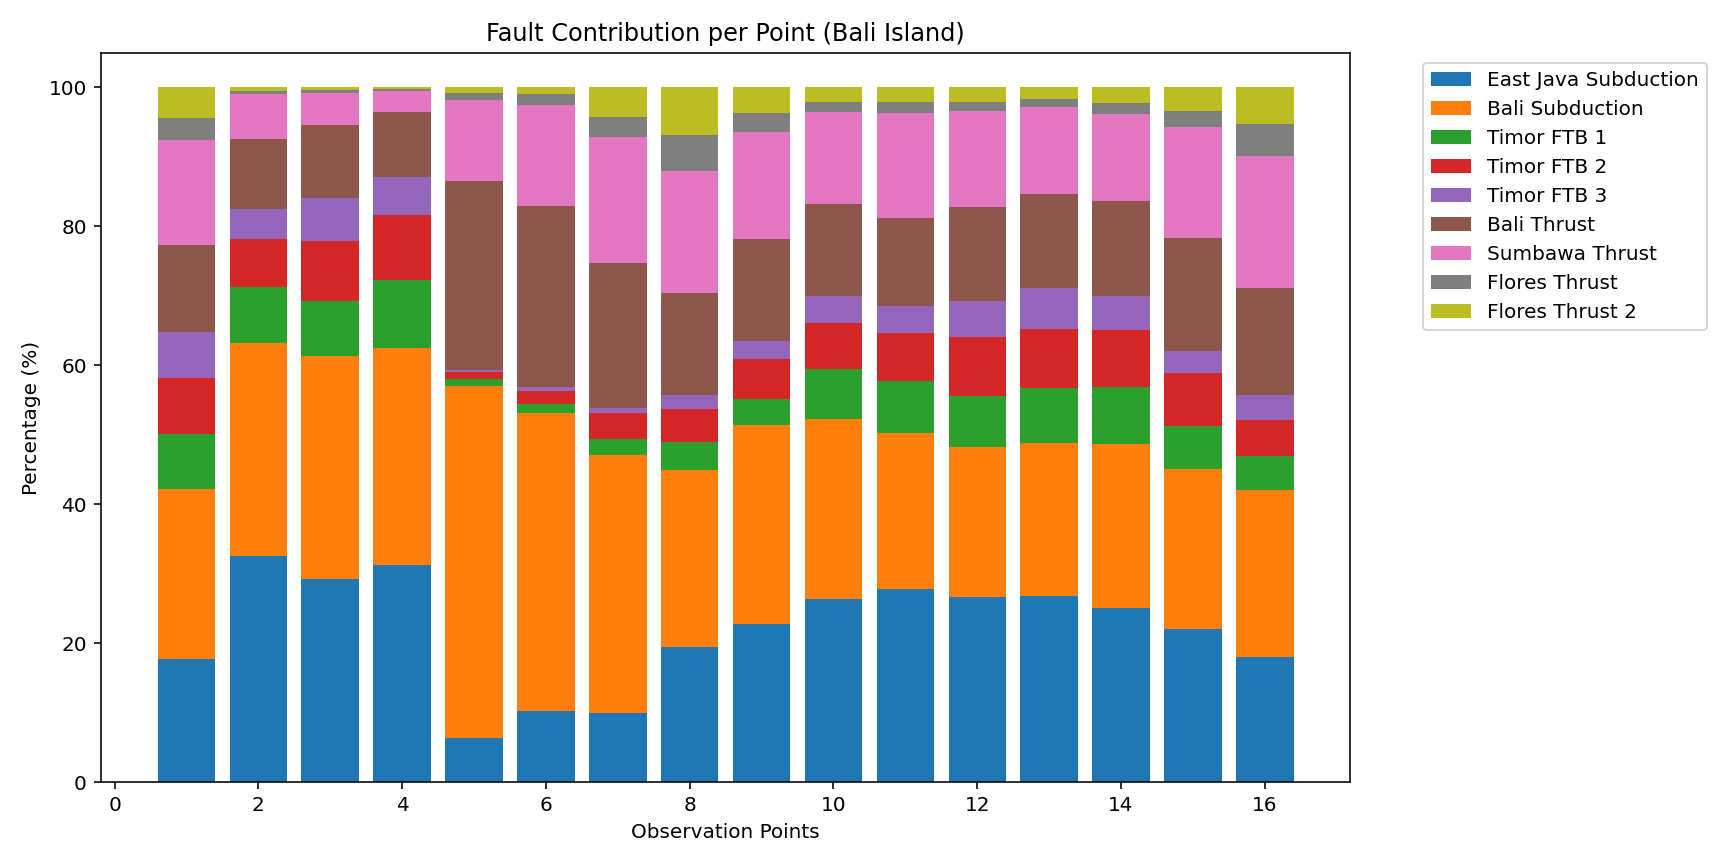


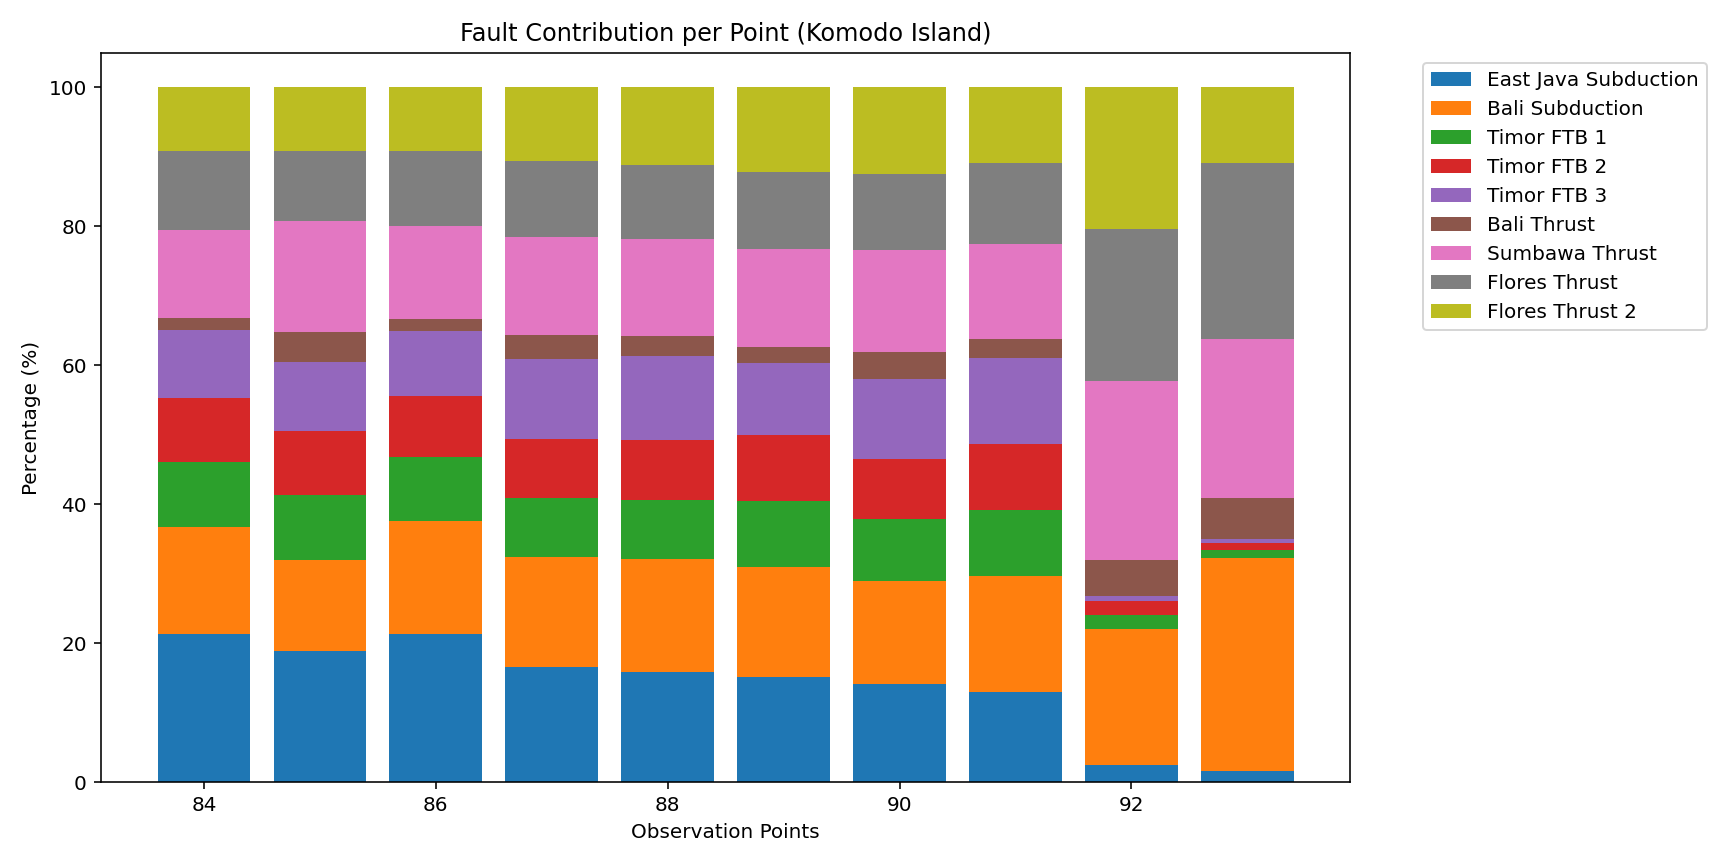


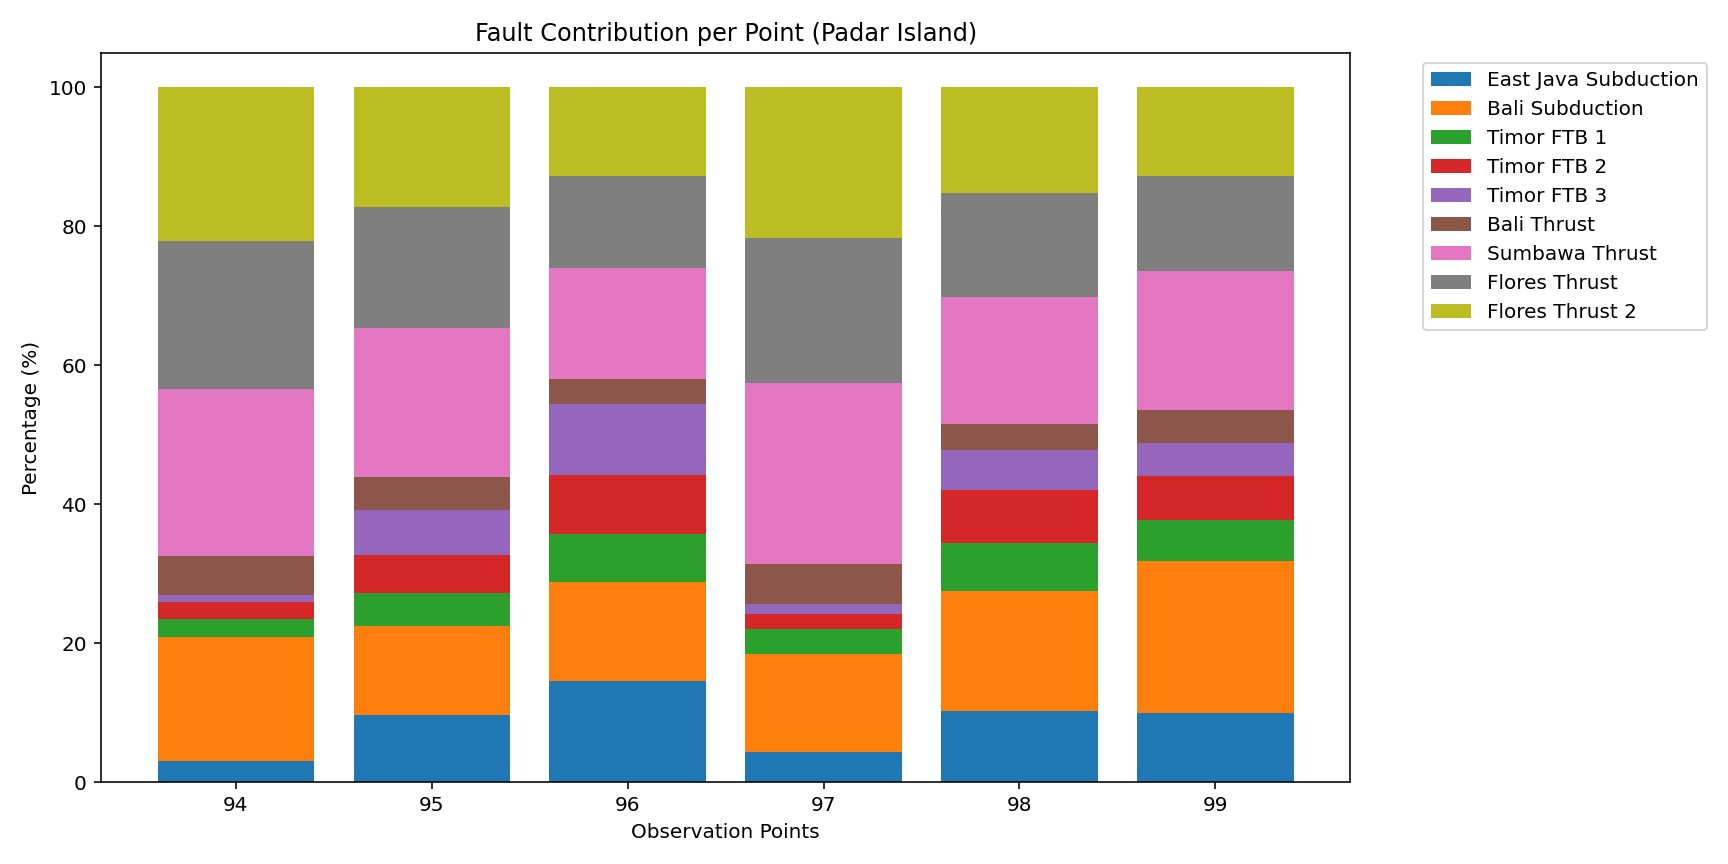


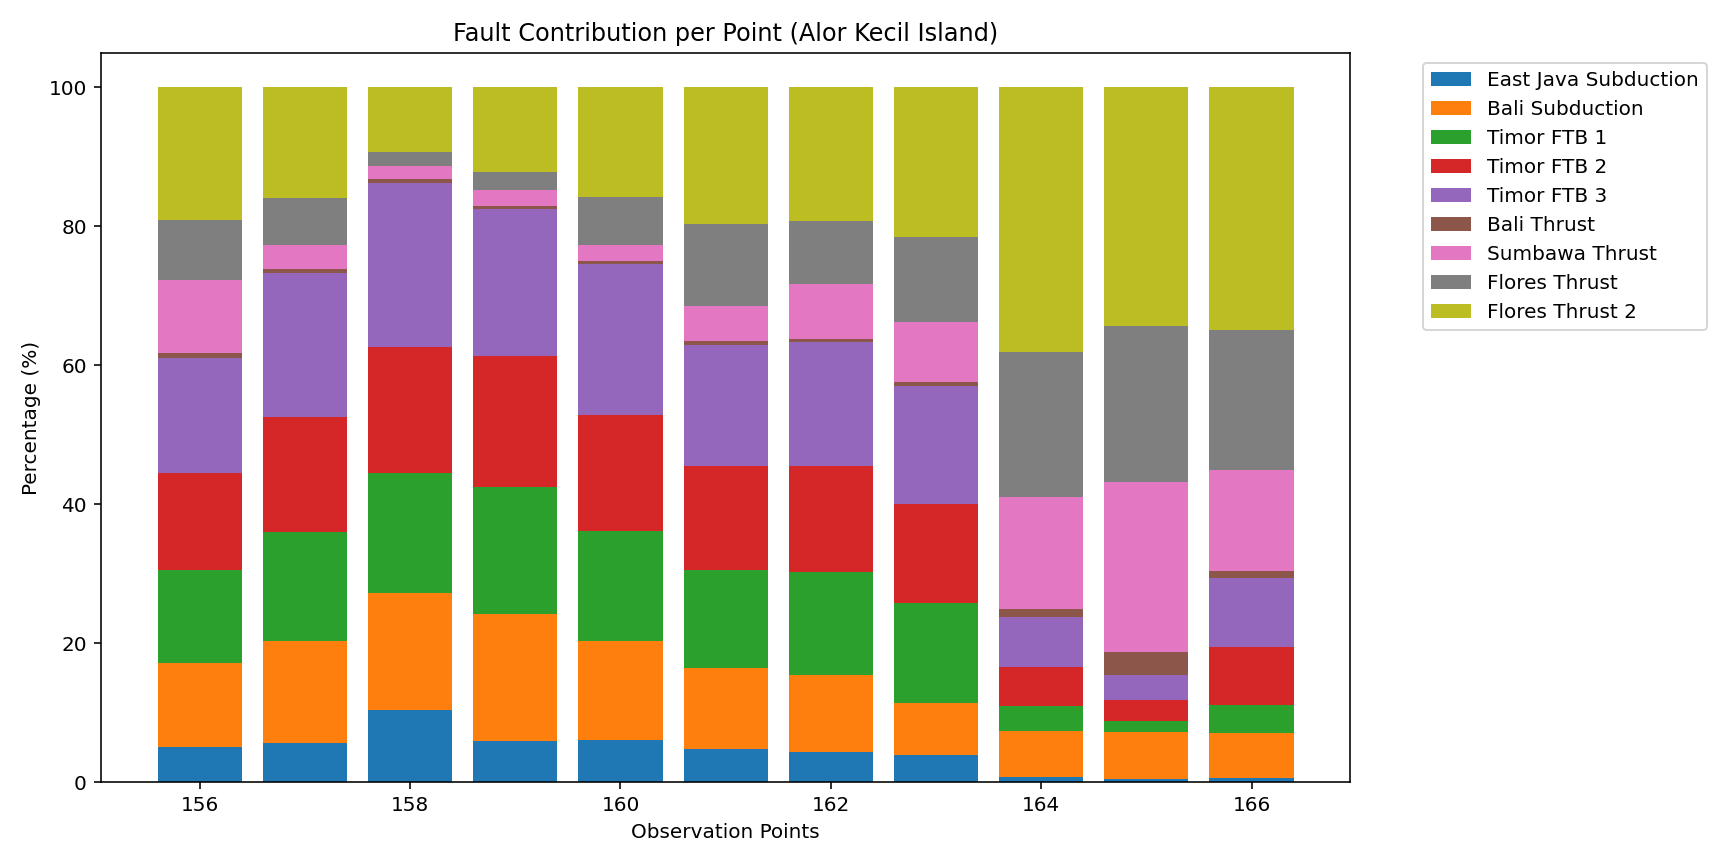


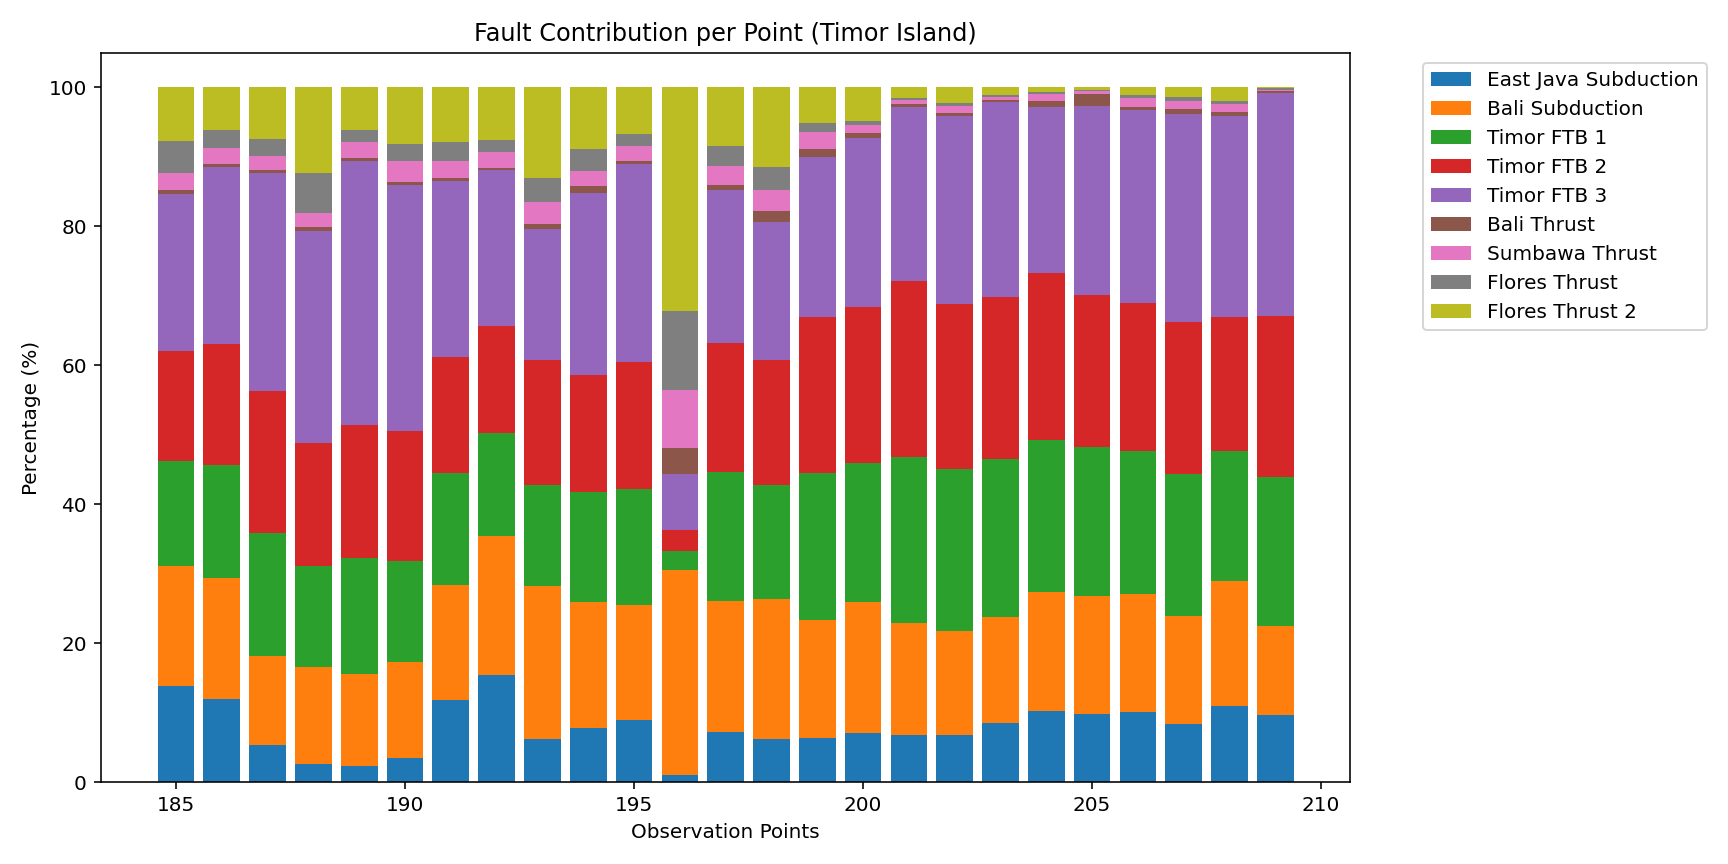

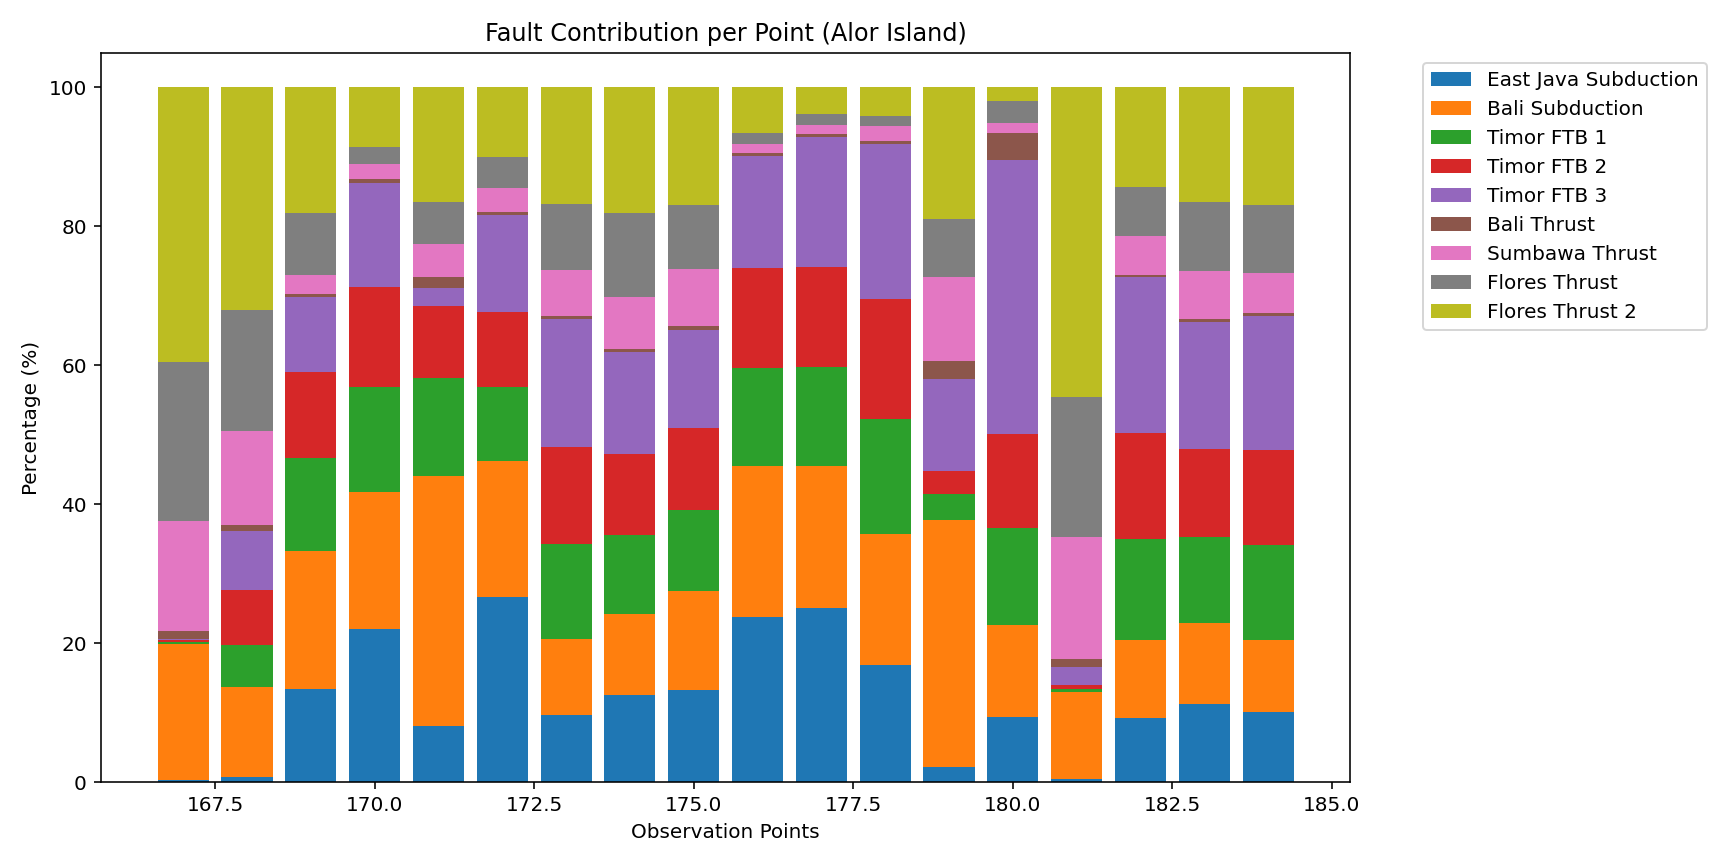


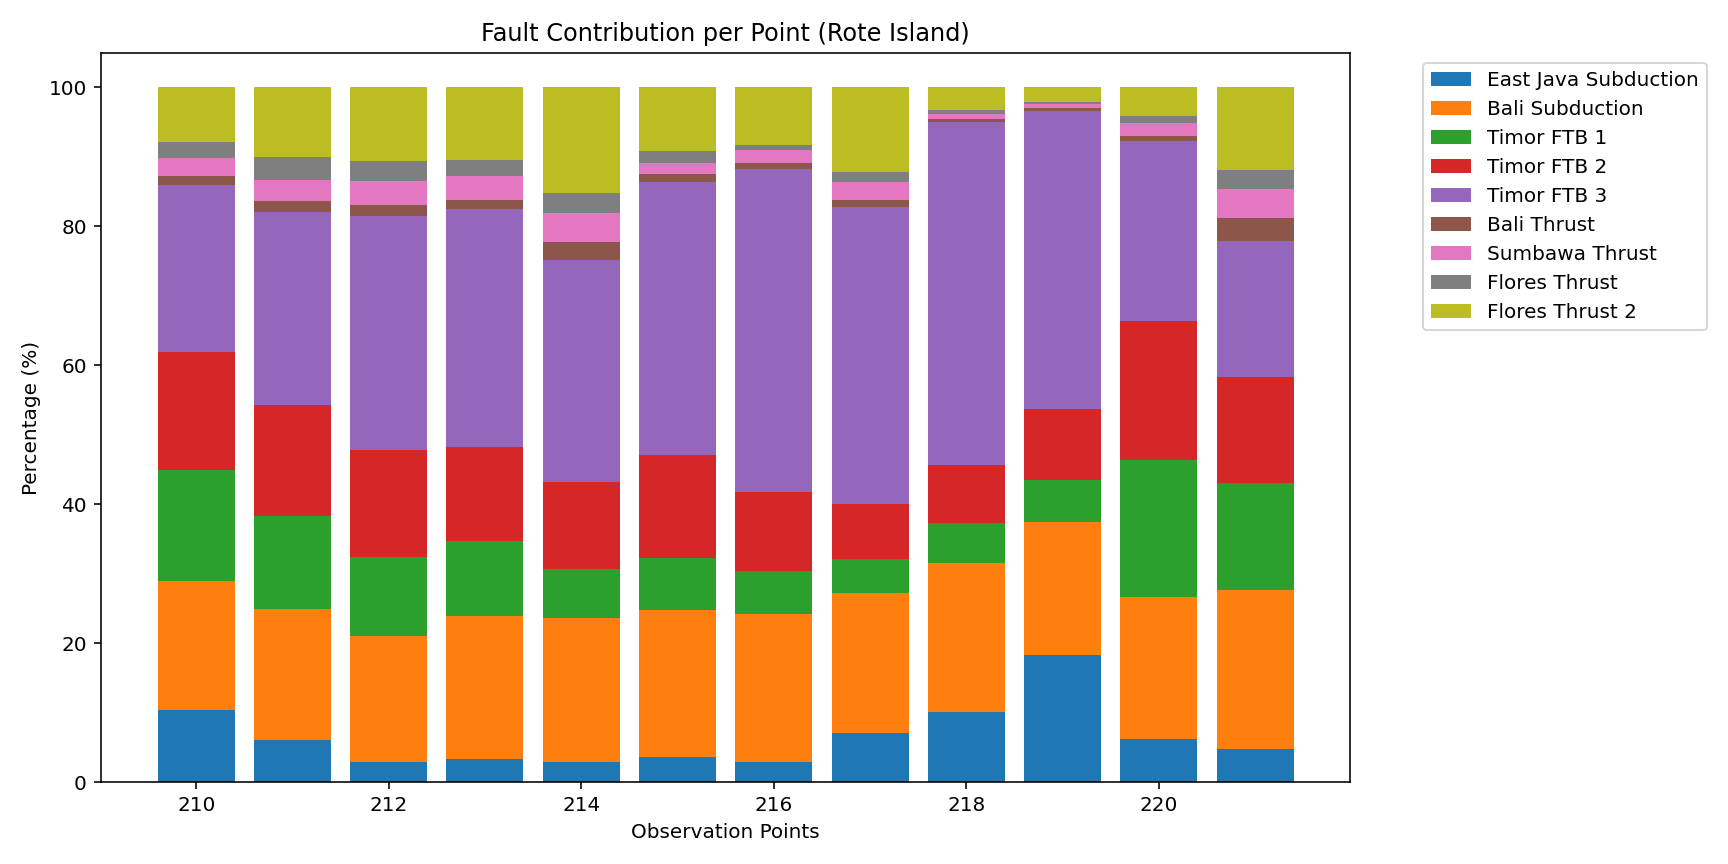


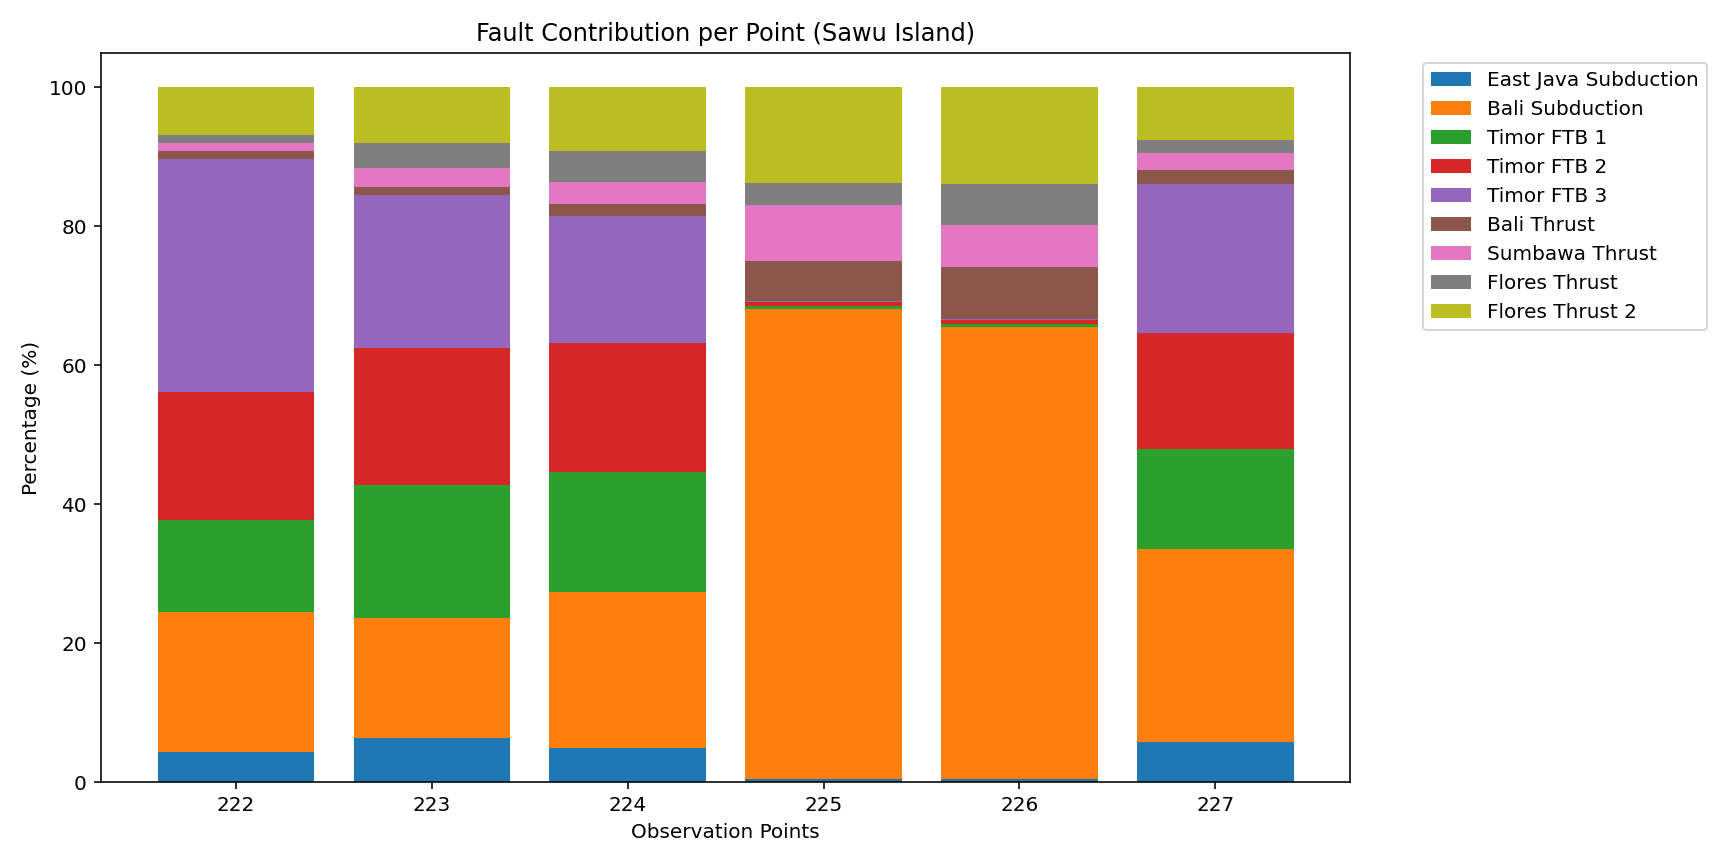


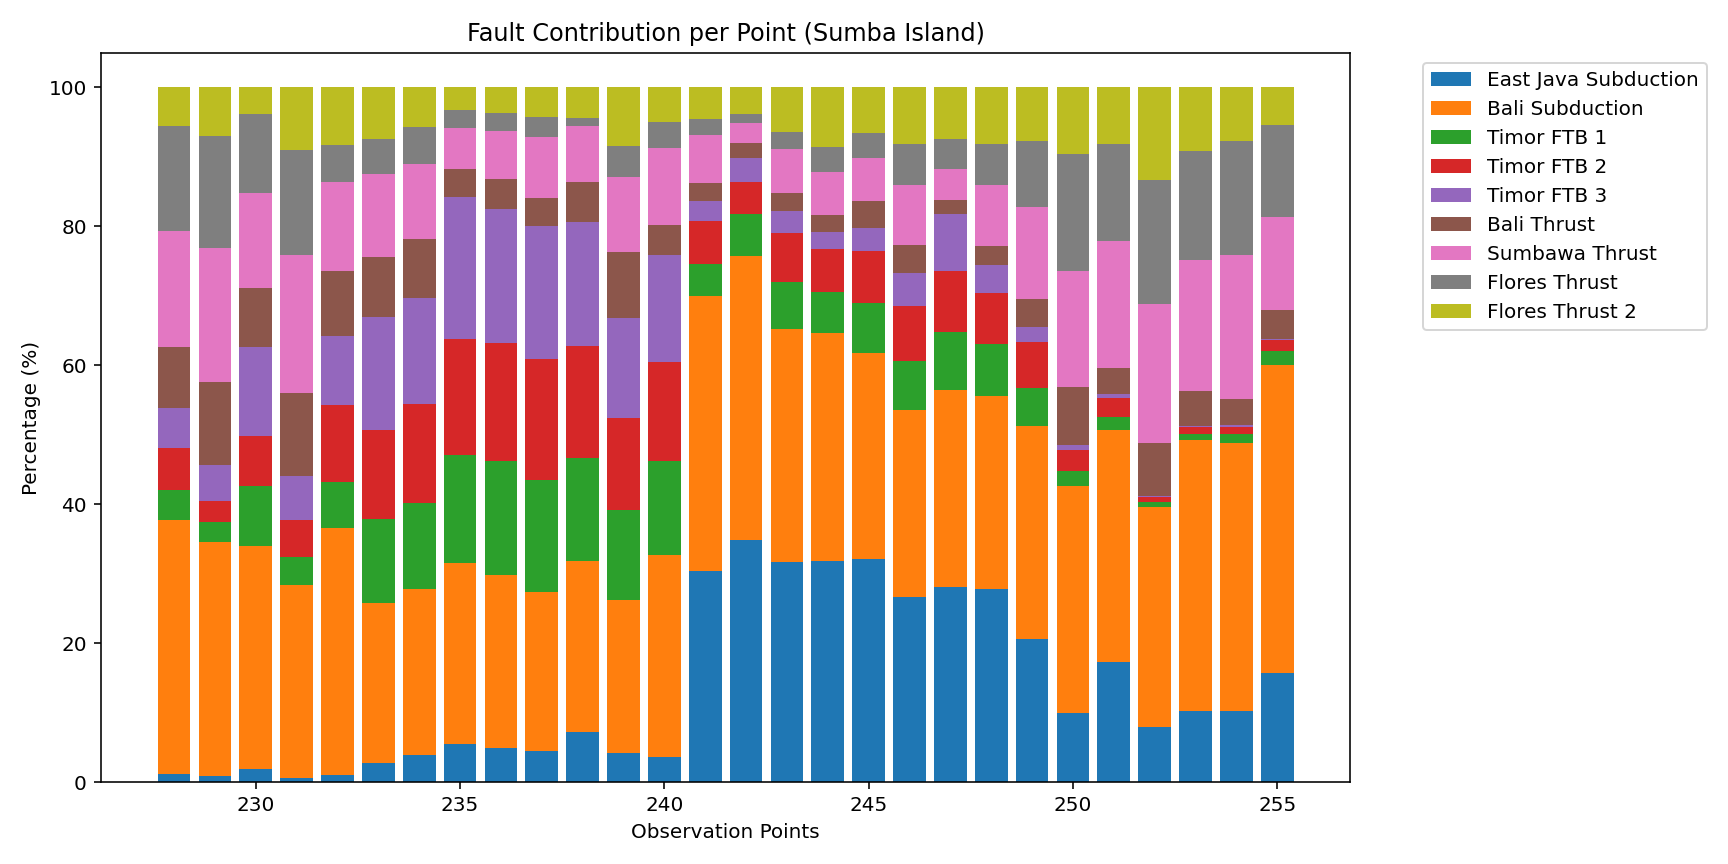


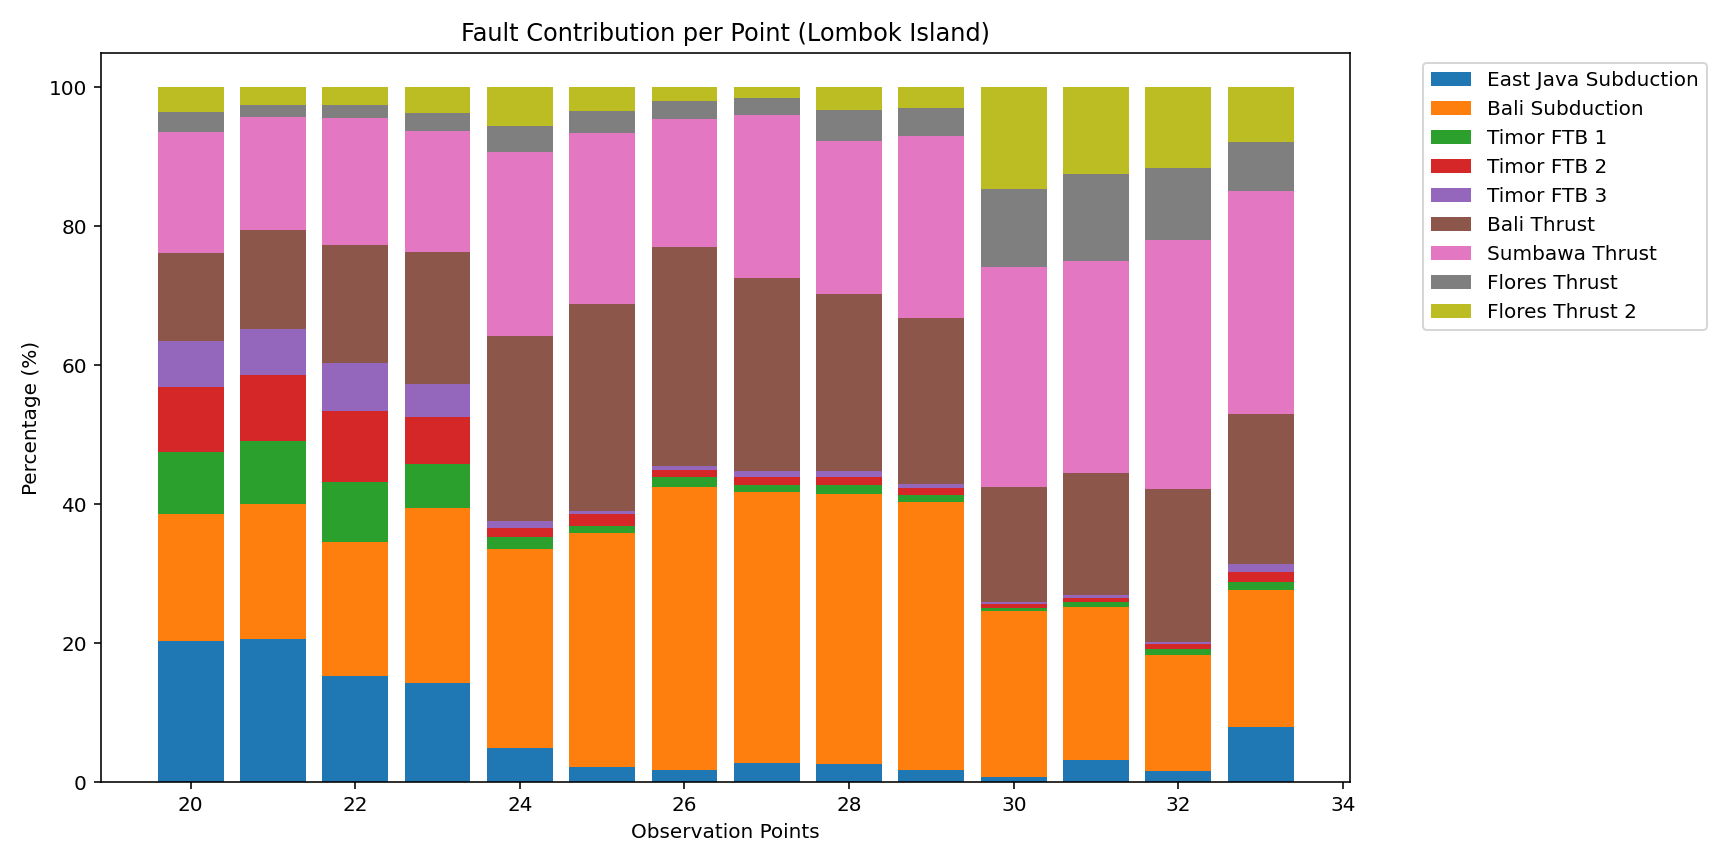


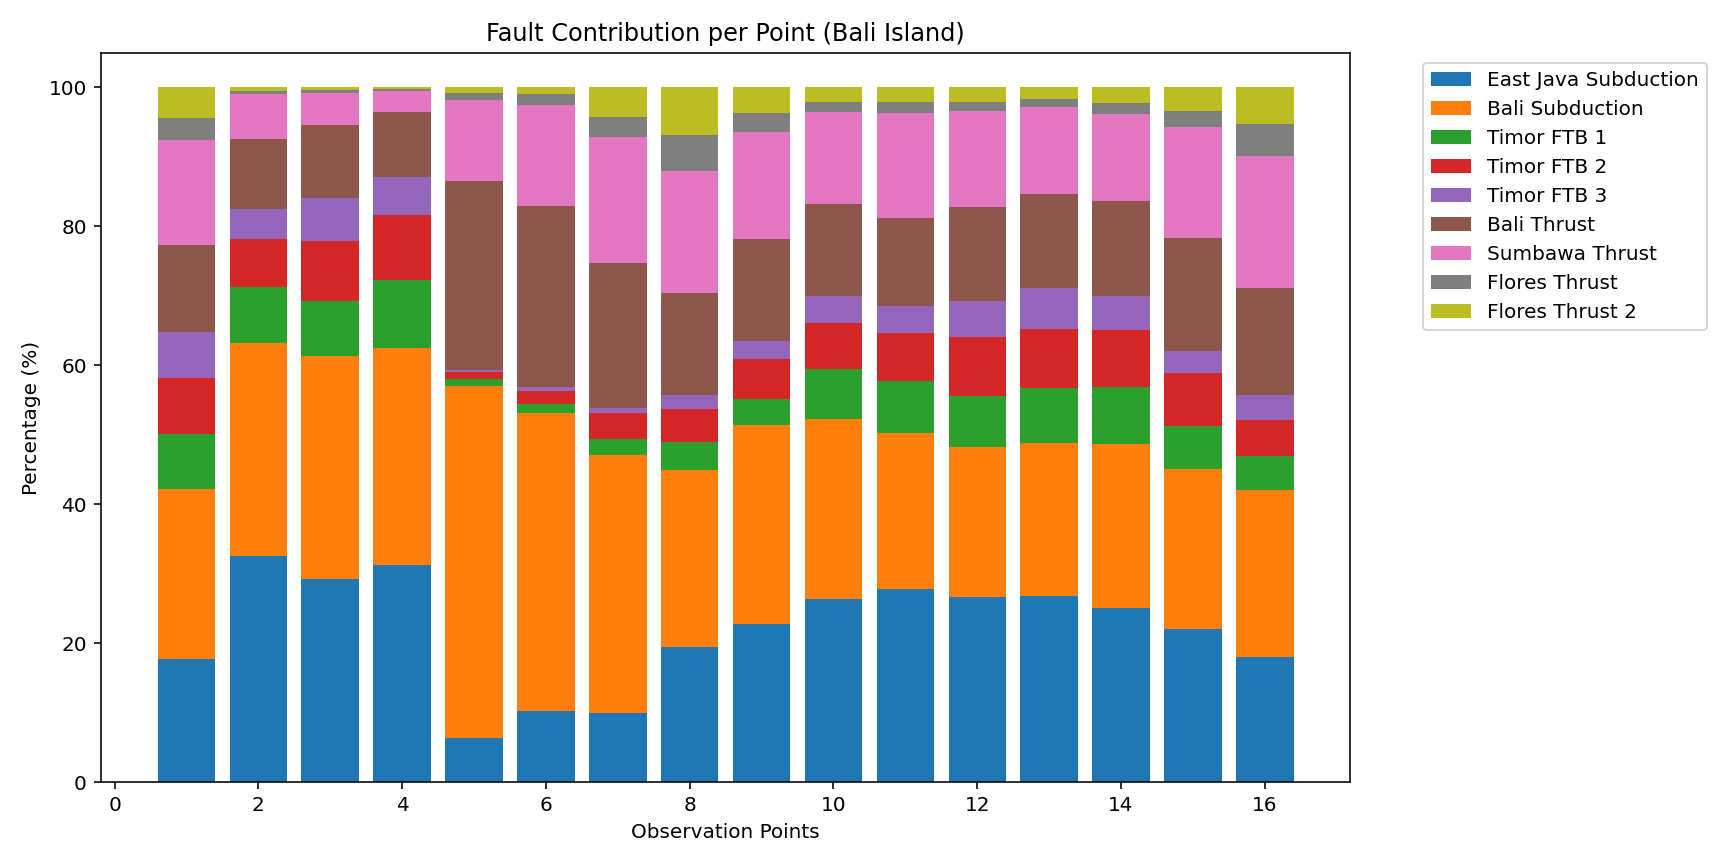


Supplementary Fig. 16 Deaggregation for 12 islands (255 observation points)
